# Supplementary material
Source: PubMed Central journal article supplement (PMC3030380)
Supplement: supp_M110.193888_jbc.M110.193888-1.pdf [file supp_M110.193888_jbc.M110.193888-1.pdf]

## SUPPLEMENTARY DATA

### Table of Contents

Supplementary Figure 1

Supplementary Table S1

Supplementary Table S2

### Figure S1 *Drosophila* Piwi proteins are not colocalized with Yb.

Immunofluorescent co-staining of Flag-Yb (green) and Piwi (A), Ago3 (B) and Aub (C) (red) in 5xFlag-Yb transgenic germaria and early stage egg chambers. DNA was labeled by DAPI (blue).

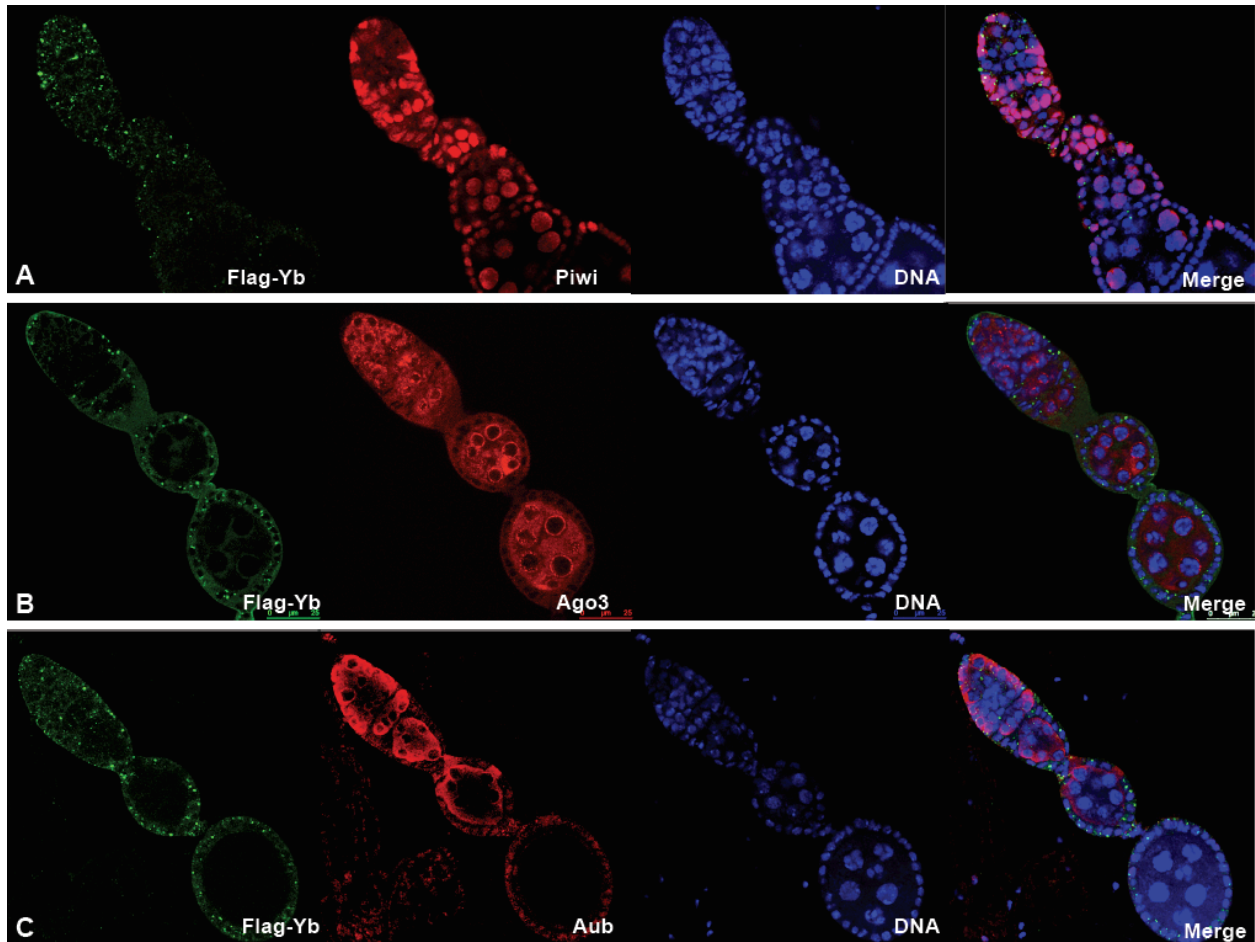

**Table S1 Small RNA profiles of *Yb* mutant and wild-type ovaries.**

| <b>Types of small RNAs</b>                 | <b>WT</b>  | <b>Yb mutant</b> | <b>Yb mutant(normalized)</b> |
|--------------------------------------------|------------|------------------|------------------------------|
| Total small RNAs (after removal of linker) | 20,142,424 | 15,375,387       | 39,499,056                   |
| Genomic-matched small RNAs                 | 17,872,442 | 14,263,153       | 36,641,749                   |
| Cellular RNAs-filtered small RNAs          | 10,112,172 | 3,455,747        | 8,877,743                    |
| microRNA-matched small RNAs                | 2,772,692  | 1,079,297        | 2,772,692                    |
| Transposon-derived 23-28nt small RNAs      | 4,673,835  | 1,415,873        | 3,637,348                    |
| Transposon-derived 21nt small RNAs         | 203,020    | 97,027           | 249,260                      |
| Small RNAs uniquely mapped to 42AB         | 208,826    | 73,065           | 187,702                      |
| Small RNAs uniquely mapped to Flamenco     | 106,065    | 1,356            | 3,483                        |

**Table S2 miRNA profiles of *Yb* mutant and wild-type ovaries.**

| miRNAs        | Number of reads<br>from WT | Number of reads<br>from <i>Yb</i> mutant | <i>Yb</i> mutant<br>Normalized |
|---------------|----------------------------|------------------------------------------|--------------------------------|
| dme-mir-989   | 791774                     | 170239                                   | 434976.4064                    |
| dme-mir-184   | 701676                     | 292527                                   | 747433.5684                    |
| dme-mir-9c    | 290339                     | 114628                                   | 292885.1527                    |
| dme-mir-263a  | 273257                     | 108199                                   | 276458.4625                    |
| dme-mir-1     | 140863                     | 122840                                   | 313867.573                     |
| dme-mir-318   | 83237                      | 14870                                    | 37994.22673                    |
| dme-mir-317   | 63398                      | 70577                                    | 180330.7693                    |
| dme-mir-9b    | 50460                      | 17892                                    | 45715.71651                    |
| dme-bantam    | 46332                      | 13739                                    | 35104.41701                    |
| dme-mir-8     | 42832                      | 14484                                    | 37007.96099                    |
| dme-mir-283   | 40911                      | 6873                                     | 17561.15133                    |
| dme-mir-305   | 24740                      | 12610                                    | 32219.71749                    |
| dme-mir-12    | 23931                      | 8073                                     | 20627.26243                    |
| dme-mir-312   | 20292                      | 9187                                     | 23473.63557                    |
| dme-let-7     | 20084                      | 11898                                    | 30400.49157                    |
| dme-mir-994   | 19723                      | 6696                                     | 17108.89994                    |
| dme-mir-33    | 14696                      | 4763                                     | 12169.90598                    |
| dme-mir-276a  | 13081                      | 18953                                    | 48426.66975                    |
| dme-mir-11    | 11909                      | 4271                                     | 10912.80043                    |
| dme-mir-986   | 9231                       | 10                                       | 25.55092584                    |
| dme-mir-13b-2 | 7601                       | 3709                                     | 9476.838394                    |
| dme-mir-13b-1 | 7343                       | 3655                                     | 9338.863395                    |
| dme-mir-31b   | 7017                       | 2474                                     | 6321.299053                    |
| dme-mir-275   | 5861                       | 4732                                     | 12090.69811                    |
| dme-mir-14    | 5238                       | 6781                                     | 17326.08281                    |
| dme-mir-2b-2  | 4274                       | 4038                                     | 10317.46385                    |
| dme-mir-2b-1  | 4167                       | 4023                                     | 10279.13747                    |
| dme-mir-311   | 4114                       | 1363                                     | 3482.591192                    |
| dme-mir-282   | 3960                       | 1016                                     | 2595.974065                    |
| dme-mir-92b   | 3841                       | 1283                                     | 3278.183785                    |
| dme-mir-2a-2  | 3307                       | 3143                                     | 8030.655992                    |
| dme-mir-2a-1  | 3113                       | 2964                                     | 7573.294419                    |
| dme-mir-279   | 3112                       | 1423                                     | 3635.896747                    |
| dme-mir-306   | 3072                       | 3066                                     | 7833.913863                    |
| dme-mir-284   | 2762                       | 2840                                     | 7256.462939                    |
| dme-mir-996   | 2628                       | 1069                                     | 2731.393972                    |
| dme-mir-92a   | 2481                       | 934                                      | 2386.456474                    |
| dme-mir-286   | 2338                       | 2331                                     | 5955.920814                    |
| dme-mir-988   | 2323                       | 1104                                     | 2820.822213                    |
| dme-mir-281-2 | 2006                       | 595                                      | 1520.280088                    |
| dme-mir-31a   | 1813                       | 841                                      | 2148.832863                    |
| dme-mir-7     | 1552                       | 568                                      | 1451.292588                    |
| dme-mir-965   | 1506                       | 363                                      | 927.498608                     |
| dme-mir-281-1 | 1379                       | 339                                      | 866.176386                     |
| dme-mir-9a    | 1290                       | 378                                      | 965.8249968                    |
| dme-mir-5     | 1256                       | 1015                                     | 2593.418973                    |
| dme-mir-999   | 1250                       | 1076                                     | 2749.279621                    |
| dme-mir-1010  | 1099                       | 181                                      | 462.4717577                    |

|                 |      |      |             |
|-----------------|------|------|-------------|
| dme-mir-100     | 1098 | 414  | 1057.80833  |
| dme-mir-983-1   | 1097 | 1267 | 3237.302304 |
| dme-mir-983-2   | 1097 | 1267 | 3237.302304 |
| dme-mir-304     | 1076 | 427  | 1091.024533 |
| dme-mir-316     | 982  | 1122 | 2866.813879 |
| dme-mir-79      | 979  | 328  | 838.0703676 |
| dme-mir-190     | 958  | 140  | 357.7129618 |
| dme-mir-995     | 848  | 414  | 1057.80833  |
| dme-mir-1012    | 763  | 491  | 1254.550459 |
| dme-mir-34      | 651  | 1519 | 3881.185635 |
| dme-mir-998     | 590  | 199  | 508.4634242 |
| dme-mir-10      | 502  | 117  | 298.9458323 |
| dme-mir-970     | 456  | 311  | 794.6337937 |
| dme-mir-277     | 335  | 419  | 1070.583793 |
| dme-mir-315     | 330  | 3    | 7.665277752 |
| dme-mir-278     | 306  | 211  | 539.1245352 |
| dme-mir-960     | 259  | 120  | 306.6111101 |
| dme-mir-1005    | 233  | 103  | 263.1745362 |
| dme-mir-313     | 195  | 144  | 367.9333321 |
| dme-mir-310     | 193  | 194  | 495.6879613 |
| dme-mir-956     | 176  | 34   | 86.87314786 |
| dme-mir-87      | 165  | 378  | 965.8249968 |
| dme-mir-308     | 150  | 21   | 53.65694427 |
| dme-mir-1003    | 143  | 47   | 120.0893515 |
| dme-mir-959     | 143  | 90   | 229.9583326 |
| dme-mir-6-1     | 118  | 124  | 316.8314804 |
| dme-mir-6-2     | 115  | 124  | 316.8314804 |
| dme-mir-125     | 114  | 63   | 160.9708328 |
| dme-mir-276b    | 112  | 65   | 166.081018  |
| dme-mir-iab-4   | 103  | 47   | 120.0893515 |
| dme-mir-iab-4as | 103  | 47   | 120.0893515 |
| dme-mir-6-3     | 99   | 104  | 265.7296287 |
| dme-mir-958     | 65   | 1    | 2.555092584 |
| dme-mir-1006    | 64   | 26   | 66.43240719 |
| dme-mir-2c      | 64   | 70   | 178.8564809 |
| dme-mir-1013    | 62   | 37   | 94.53842561 |
| dme-mir-263b    | 53   | 8    | 20.44074067 |
| dme-mir-987     | 50   | 25   | 63.8773146  |
| dme-mir-961     | 43   | 16   | 40.88148135 |
| dme-mir-375     | 42   | 70   | 178.8564809 |
| dme-mir-1008    | 41   | 14   | 35.77129618 |
| dme-mir-314     | 41   | 7    | 17.88564809 |
| dme-mir-193     | 38   | 13   | 33.21620359 |
| dme-mir-307     | 37   | 118  | 301.5009249 |
| dme-mir-307-as  | 37   | 118  | 301.5009249 |
| dme-mir-982     | 37   | 117  | 298.9458323 |
| dme-mir-137     | 36   | 14   | 35.77129618 |
| dme-mir-4       | 29   | 17   | 43.43657393 |
| dme-mir-927     | 29   | 7    | 17.88564809 |
| dme-mir-962     | 29   | 12   | 30.66111101 |
| dme-mir-1009    | 28   | 12   | 30.66111101 |
| dme-mir-252     | 25   | 23   | 58.76712943 |
| dme-mir-932     | 25   | 12   | 30.66111101 |
| dme-mir-1000    | 21   | 16   | 40.88148135 |

|              |         |         |             |
|--------------|---------|---------|-------------|
| dme-mir-1002 | 20      | 3       | 7.665277752 |
| dme-mir-1007 | 19      | 7       | 17.88564809 |
| dme-mir-954  | 19      | 15      | 38.32638876 |
| dme-mir-2489 | 18      | 18      | 45.99166651 |
| dme-mir-964  | 18      | 9       | 22.99583326 |
| dme-mir-991  | 16      | 38      | 97.0935182  |
| dme-mir-274  | 15      | 7       | 17.88564809 |
| dme-mir-963  | 15      | 5       | 12.77546292 |
| dme-mir-966  | 9       | 19      | 48.5467591  |
| dme-mir-967  | 9       | 1       | 2.555092584 |
| dme-mir-976  | 9       | 11      | 28.10601843 |
| dme-mir-124  | 8       | 1       | 2.555092584 |
| dme-mir-13a  | 8       | 1       | 2.555092584 |
| dme-mir-1001 | 7       | 4       | 10.22037034 |
| dme-mir-980  | 7       | 4       | 10.22037034 |
| dme-mir-1015 | 6       | 3       | 7.665277752 |
| dme-mir-984  | 6       | 18      | 45.99166651 |
| dme-mir-2279 | 4       | 4       | 10.22037034 |
| dme-mir-2497 | 4       | 0       | 0           |
| dme-mir-2501 | 4       | 0       | 0           |
| dme-mir-957  | 4       | 29      | 74.09768494 |
| dme-mir-981  | 4       | 3       | 7.665277752 |
| dme-mir-2283 | 3       | 1       | 2.555092584 |
| dme-mir-3    | 3       | 14      | 35.77129618 |
| dme-mir-929  | 3       | 3       | 7.665277752 |
| dme-mir-969  | 3       | 2       | 5.110185168 |
| dme-mir-1016 | 2       | 1       | 2.555092584 |
| dme-mir-2490 | 2       | 0       | 0           |
| dme-mir-955  | 2       | 0       | 0           |
| dme-mir-1014 | 1       | 0       | 0           |
| dme-mir-133  | 1       | 2       | 5.110185168 |
| dme-mir-2282 | 1       | 1       | 2.555092584 |
| dme-mir-2493 | 1       | 0       | 0           |
| dme-mir-972  | 1       | 3       | 7.665277752 |
| dme-mir-975  | 1       | 0       | 0           |
| dme-mir-977  | 1       | 1       | 2.555092584 |
| dme-mir-985  | 1       | 0       | 0           |
| dme-mir-992  | 1       | 0       | 0           |
| dme-mir-2496 | 0       | 1       | 2.555092584 |
| dme-mir-2500 | 0       | 4       | 10.22037034 |
| dme-mir-303  | 0       | 2       | 5.110185168 |
| dme-mir-968  | 0       | 2       | 5.110185168 |
| dme-mir-973  | 0       | 2       | 5.110185168 |
| dme-mir-978  | 0       | 1       | 2.555092584 |
| Total        | 2790110 | 1091980 | 2790110     |
